# Supplementary material for: Identification and Characterisation of the CircRNAs Involved in the Regulation of Leaf Colour in Quercus mongolica
Source: MDPI journal article supplement (doi:10.3390/biology13030183), 2024-03-14
Supplement: s1 [file s1]

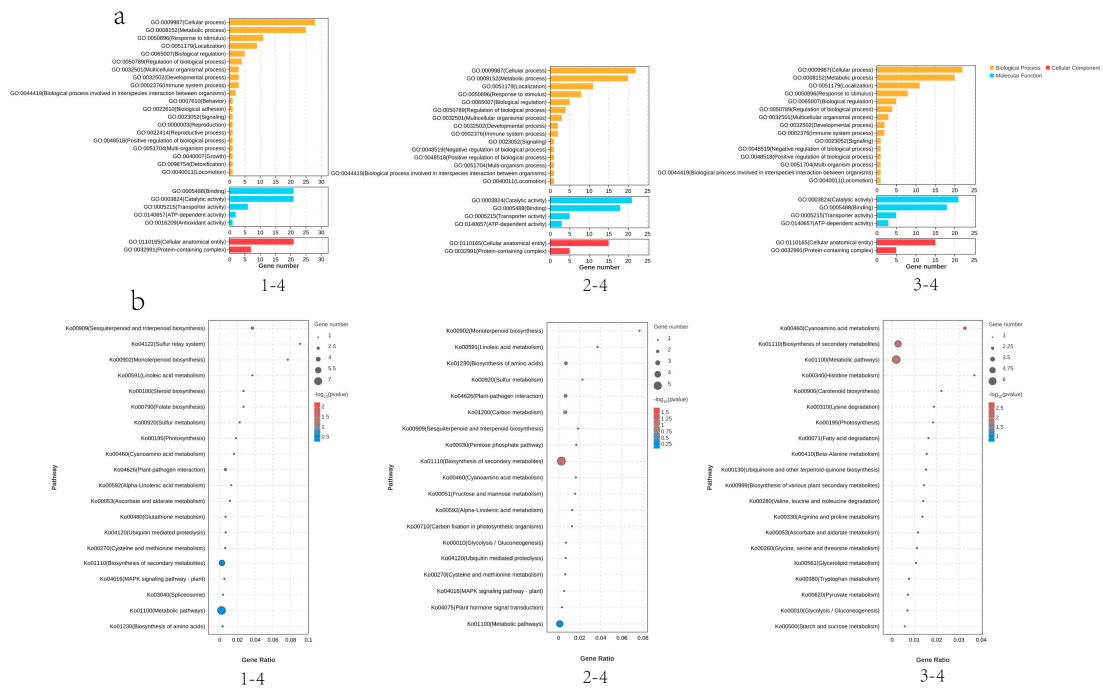

**Supplementary Figure S1.** (a) Bar chart for Gene Ontology enrichment analysis of three comparison groups. (b) Significance bubble plots for Kyoto Encyclopedia of Genes and Genomes (KEGG) analysis of three comparison groups.

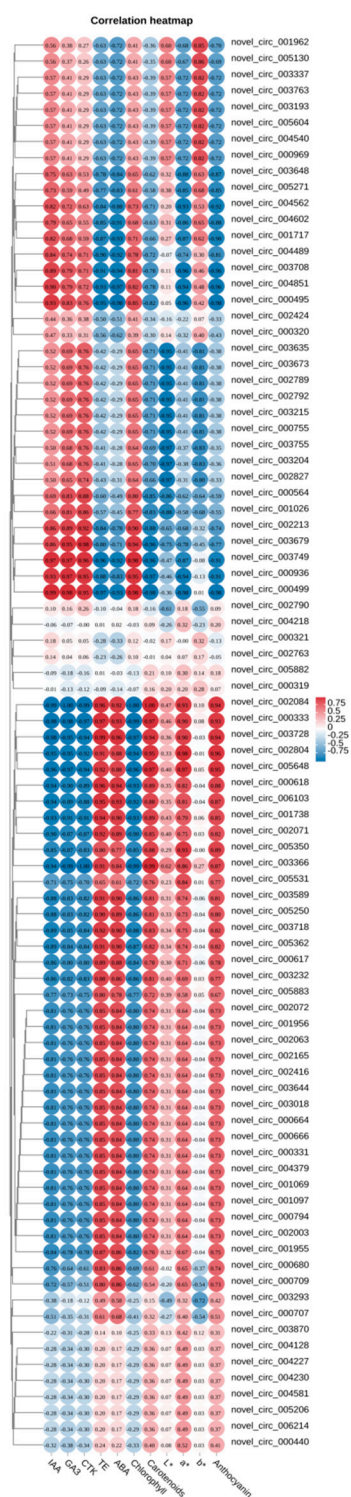

**Supplementary Figure S2.** Heat map of leaf color parameters, pigment content and five phytohormones in relation to circRNAs.
